# Supplementary material for: Auxin-Producing Bacteria from Duckweeds Have Different Colonization Patterns and Effects on Plant Morphology
Source: MDPI journal article supplement (doi:10.3390/plants11060721), 2022-03-08

**Figure S1. Effect of *Microbacterium* RU1A on *Arabidopsis* root hairs.** Inoculation of RU1A resulted in an increase in root hairs compared to the sterile control. Phase contrast microscopy was performed using the Olympus FSX100 microscope at 1/90 second exposure time with the 10x objective lens.

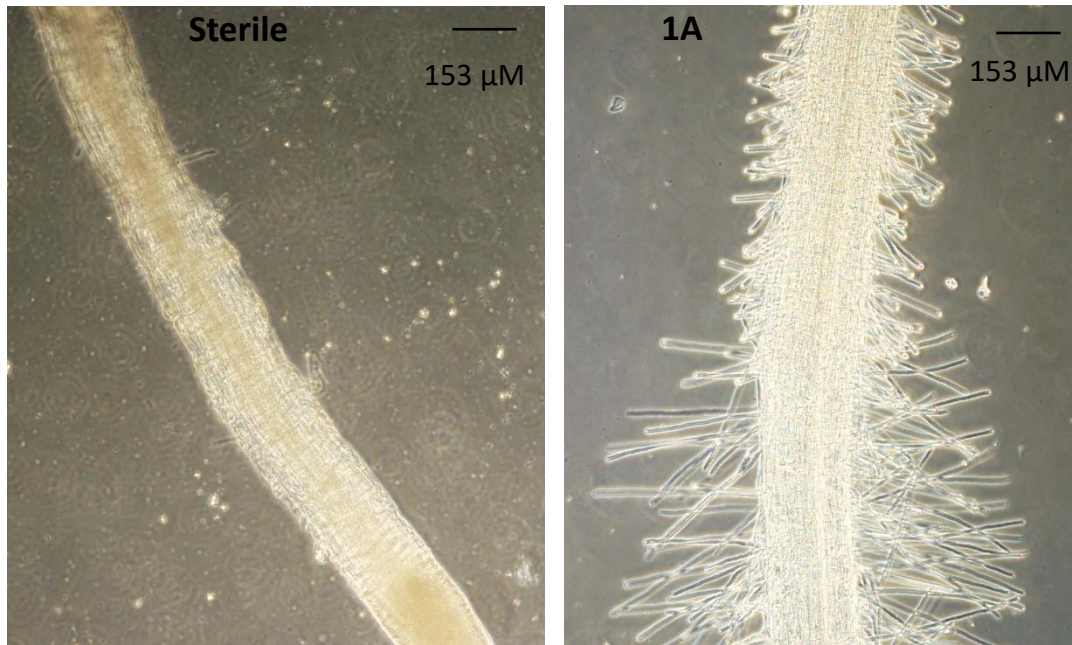

Supplement: s1 [file s1]
